# Supplementary material
Source: PubMed Central journal article supplement (PMC6233808)
Supplement: jamapsychiatry-75-1052-s001.pdf [file jamapsychiatry-75-1052-s001.pdf]

---

## Supplementary Online Content

Cheng W, Rolls ET, Ruan H, Feng J. Functional connectivities in the brain that mediate the association between depressive problems and sleep quality. *JAMA Psychiatry*. Published online July 25, 2018. doi:10.1001/jamapsychiatry.2018.1941

**eMethods.** Materials and Methods

**eFigure 1.** The correlation between the PSQI total score and the other available sleep measures in the HCP dataset, based on the sample of 1017 individuals.

**eFigure 2.** The Shen atlas areas with functional connectivities related to sleep quality.

**eFigure 3.** Brain areas with functional connectivities related to both the sleep quality (PSQI) and the ASR DSM Depressive Problems scores from the HCP analysis.

**eFigure 4.** Brain areas with functional connectivities related to the ASR DSM Depressive Problems scores from the HCP analysis.

**eFigure 5.** Mediation analysis.

**eTable 1.** The anatomical regions defined in each hemisphere.

**eTable 2.** Functional connectivities related to the ASR DSM Depressive Problems scores from the HCP analysis using 1017 participants.

**eTable 3.** Functional connectivities correlated with the ASR DSM Depressive Problems scores from the HCP analysis based on the 92 participants who had at some time been diagnosed with depression.

**eTable 4.** The results of the mediation analysis performed for the 39 individual links that were correlated with sleep quality and the Depressive Problems score.

**eTable 5.** The demographic characteristics of participants of the Biobank dataset.

**eReferences.**

This supplementary material has been provided by the authors to give readers additional information about their work.

---

## **eMethods. Materials and Methods**

### **Primary dataset from the Human Connectome Project**

The dataset used for this investigation was selected from the Mar 2017 public data release from the Human Connectome Project (HCP, N = 1200), WU-Minn Consortium. Our sample includes 1017 subjects (ages 22–35 years, 546 females) scanned on a 3-T Siemens connectome-Skyra scanner. Two resting state fMRI acquisitions on different days were used. The four resting-state runs of approximately 15 minutes each were acquired in separate sessions on two different days, with eyes open with relaxed fixation on a projected bright cross-hair on a dark background. The WU-Minn HCP Consortium obtained full informed consent from all participants, and research procedures and ethical guidelines were followed in accordance with the Institutional Review Boards (IRB). The demographic characteristics of participants are summarized in Table 1. More details of subjects, the collection and preprocessing of the data are provided at the HCP website (<http://www.humanconnectome.org/>). Briefly, data pre-processing was carried out using FSL (FMRIB Software Library), FreeSurfer, and the Connectome Workbench software. All the data preprocessing procedures were performed by the human connectome project (HCP) as described in <sup>1</sup>. The data preprocessing included correction for spatial and gradient distortions and head motion, intensity normalization and bias field removal, registration to the T1 weighted structural image, transformation to 2 mm Montreal Neurological Institute (MNI) space, and the FIX artefact removal procedure <sup>2,3</sup>. Finally, the head motion parameters are regressed out and structured artefacts are removed by ICA+FIX processing (Independent Component Analysis followed by FMRIB's ICA-based X-noiseifier <sup>4,5</sup>). The data preprocessing pipeline developed by FMRIB (Oxford University Centre for Functional MRI of the Brain) used here has been widely used in resting state fMRI studies <sup>2,6-8</sup>.

The first 20 volumes were discarded to suppress equilibration effects and participants without the full 1200 time points in four resting-state runs were also removed from the following analysis. The resulting time courses were used for the construction and analysis of the brain network.

### **Cross-validation dataset: the UK Biobank dataset**

The initial release of UK Biobank imaging data was used for cross-validation and consisted of 9850 subjects (ages 46–78 years, 5155 females) scanned on a single standard Siemens Skyra 3T scanner. After quality controls and removing some participants without behavioral data, 8718 participants remained in this study. The UK Biobank received ethical approval from the research ethics committee (REC reference 11/NW/0382). The present analyses were conducted under UK Biobank application number 1954. Written informed consent was obtained from each subject. The demographic characteristics of participants are summarized in Table S5. The details of the image acquisition are provided at the UK Biobank website in the form of a protocol (<http://biobank.ctsu.ox.ac.uk/crystal/refer.cgi?id=2367>). All the quality checking and data preprocessing procedures were conducted by the UK Biobank and the details of the preprocessing are available on the UK Biobank website (<http://biobank.ctsu.ox.ac.uk/crystal/refer.cgi?id=1977>) and elsewhere <sup>9</sup>. Briefly, the following pre-processing was applied: motion correction; grand-mean intensity normalization of the entire 4D dataset by a single multiplicative factor; high-pass temporal filtering (Gaussian-weighted least-squares straight line fitting, with sigma=50.0s); EPI unwarping; gradient distortion correction unwarping. Finally, the head motion parameters are regressed out and structured artefacts are removed by ICA+FIX processing (Independent Component Analysis followed by FMRIB's ICA-based X-noiseifier <sup>4,5</sup>). Basically, the parameters and data preprocessing procedures are very consistent in both datasets which make the UK Biobank dataset useful for cross-validating the findings described here based on the HCP dataset.

### **Construction of the whole-brain functional network**

After preprocessing, the whole brain (gray matter) was parcellated into 250 regions of interest (ROI) using the Shen atlas <sup>10</sup> which has also been validated in resting state fMRI

---

studies<sup>11,12</sup>, with further details below. Then the time series were extracted in each ROI by averaging the signals of all voxels within that region. The names of the ROIs are listed in Supplementary Table 1 and the modified atlas is also provided on the website: <http://www.dcs.warwick.ac.uk/~feng/>. (This is a standard parcellation scheme, which provides a usable number of different divisions for statistical purposes when differences between regions are being investigated, and includes a useful parcellation of the orbitofrontal cortex.). The Pearson cross-correlations between all pairs of regional BOLD signals were calculated for each subject followed by z-transformation to improve normality, and the whole-brain functional connectivity network (250×250 region-based network with 31,125 edges) was constructed. Finally, the mean functional connectivity across two scans (each scan containing left to right and right to left phase encoding directions) was used for the following analysis to provide a more reliable estimation of functional connectivity.

To address the problem of multiple comparisons, the network-based statistic (NBS)<sup>13</sup> which is a well-validated method for brain network association analysis and has previously been used widely in neuroimaging studies<sup>13-16</sup> was used to identify and ascribe significance to any connected sub-networks evident in the set of significantly altered links found in the poor sleep quality group (see Supplementary Material). The NBS has been described in detail previously<sup>13</sup>. In brief, a primary threshold for each link-based  $r$  value was set to the stringent criterion of  $p < 0.001$ <sup>13</sup>, corresponding in this study to an absolute  $r > 0.103$ , and used to identify a set of supra-threshold links. Any connected components in these supra-threshold links and their size (the number of links) were then determined. Finally, a FWE-corrected  $p$ -value for each component was calculated using the null distribution of maximal connected components which was derived empirically using a nonparametric permutation approach (10,000 permutations).

### **The rationale for use of the Shen atlas**

The parcellation of the brain used in this investigation was the Shen atlas<sup>10</sup>, which was found to be useful in this investigation because it has more areas than the AAL2 (automated anatomical labelling version 2) atlas<sup>17</sup>. Since the parcellation of the orbitofrontal cortex in the Shen atlas is less useful than the AAL2 atlas, we modified the Shen atlas so that it includes the AAL2 parcellation produced by Rolls et al<sup>17</sup> of the medial orbitofrontal cortex areas (OFC\_med, OFC\_ant, OFC\_post, Rectus, and OLF) and lateral orbitofrontal cortex areas (OFC\_lat and Frontal\_Inf\_Orb2). Because the Shen atlas areas do not have individual names, we show the mapping of Shen atlas areas to AAL2 atlas areas in Table S1, and use these names when referring to particular brain areas and their functional connectivity. The AAL2 atlas is available with MRICron (<http://people.cas.sc.edu/rorden/mricron/>).

The parcellation maps provided as part of the HCP<sup>8</sup> utilize independent component analysis (ICA) to parcellate the brain and have been used in many studies. However, for the following reasons, we chose to use the Shen atlas rather than HCP atlas.

1. The parcellation maps provided by the HCP group are based on an ICA method which is a data-driven method. Therefore, different datasets would provide different parcellation maps. However, in the current study, we used another independent dataset (the UK Biobank) to cross-validate the findings driven by the HCP dataset. If we used the HCP atlas in our analysis, it would be difficult to perform this very valuable cross-validation analysis.

2. One of the important findings is that many significant results are related to the orbitofrontal cortex, and this brain area is not well defined in the HCP atlas.

3. The Shen atlas<sup>10</sup> was also created based on resting state fMRI data and has been validated in resting state fMRI studies<sup>11,12</sup> which are consistent with the current work.

### **Cross-validation using the UK Biobank dataset**

We used another separate large dataset (the UK Biobank dataset) which included 8718 participants to test whether the above findings are robust and generalize to another population. Given there is no PSQI score in the Biobank dataset, we selected another important measure of sleep, the amount of sleep (sleep duration), which is available for both datasets to test

---

whether the FCs identified in these two datasets are similar. Specifically, linear regression analysis was used to test whether the associations between the amount of sleep and functional connectivity are similar in these independent datasets. This approach is supported by the fact that a correlation of -0.51 was found between the PSQI total score and the sleep duration in a large study involving 1039 participants<sup>18</sup>.

The average sleep duration (for a 24 hour day in the last 4 weeks) which is high negatively correlated with the PSQI score ( $r = -0.574$ ,  $p < 1.0 \times 10^{-80}$ , Fig. S5), was used to test whether the FCs identified in these two datasets are similar. The association patterns between FCs and sleep duration are very similar in both the HCP dataset and the Biobank dataset (Fig. 3A). Fig. 3B shows that there is a high positive correlation ( $r=0.524$ ,  $p < 1.0 \times 10^{-30}$ ) between the  $r$  values for the correlation between the functional connectivity links for the whole brain and the sleep duration based on the HCP and Biobank datasets. Further, a Fisher's test also confirmed the correlation ( $p < 10^{-10}$ ). Then a permutation test showed that the 162 significant links identified in Fig. 1B were also negatively correlated with sleep duration in the Biobank dataset ( $p = 2.0 \times 10^{-4}$ ). Further, we found that 89 out of the 162 significant links were also significant after FDR correction ( $p < 0.05$ ) in the Biobank dataset. This cross-validation analysis thus provides evidence that the sleep-related links described here can be confirmed with an independent dataset.

### Mediation Analysis

Given that the strengths of the functional connectivities were significantly associated with the sleep quality measure (PSQI) score and depressive score, we assessed whether the functional connectivities significantly mediated<sup>19</sup> the association between the depressive problems score and the PSQI score. The mediation analysis<sup>19</sup> was performed using the Mediation Toolbox developed by Tor Wager (<https://github.com/canlab/MediationToolbox>), with a 10,000 bias-corrected bootstrap sample for significance testing. The independent (predictor) and dependent (predicted) variables were the depressive score and the sleep quality measure, respectively. The proposed mediator was the strength of functional connectivities associated with sleep quality. Mediation analyses controlled for the 14 confounding variables described in the main paper.

The mean strength of the 39 significant functional connectivities shown in Fig. 1D involved in both poor sleep quality and depressive problems significantly mediated the relationship between the PSQI score and depressive problems score (Fig. 2D, path AB) (4.8% of the total effect size,  $\beta = 0.0139$ ;  $p = 2.1 \times 10^{-5}$ ; 95% CI, 0.01 to 0.03). This provides evidence that the 39 functional connectivity links may account for this proportion of the relation of poor sleep quality on depressive problems.

Further, we also performed the same analysis on each individual functional connectivity link. We found that all 39 links significantly mediated the relationship between the PSQI sleep quality and the depressive problem score (using FDR correction,  $p < 0.05$ , Table S4). In the reverse direction, only 2 links significantly mediated effects of sleep quality on depressive problems with FDR correction. Further, the mediating effects of the 39 functional connectivities of the effects of the sleep quality on the depressive problems had much lower significance (3.4% of the total effect size,  $\beta=0.016$ ,  $p=0.0095$ , Fig. S4) than for the effect in the opposite direction described above. In other words, the increases of the 39 functional connectivities shown in Fig. 1D mediated the effect of depressive problems on sleep quality, and the effect was weaker in the opposite direction.

We note that the functional connectivities only partially mediated the association between the depressive score and the PSQI score, with 4.8% of the total effect being mediated by these functional connectivities (Fig. 2D). Factors that may contribute to the remaining 95.2% include higher firing rates of neurons in brain areas related to depression on brain areas involved in sleep.

**Figure 1.** The correlation between the PSQI total score and the other available sleep measures in the HCP dataset, based on the sample of 1017 individuals. All measures are highly correlated with PSQI total score ( $p < 1.0 \times 10^{-10}$ ). 19 out the 23 correlations had a p value less than  $1.0 \times 10^{-30}$ .

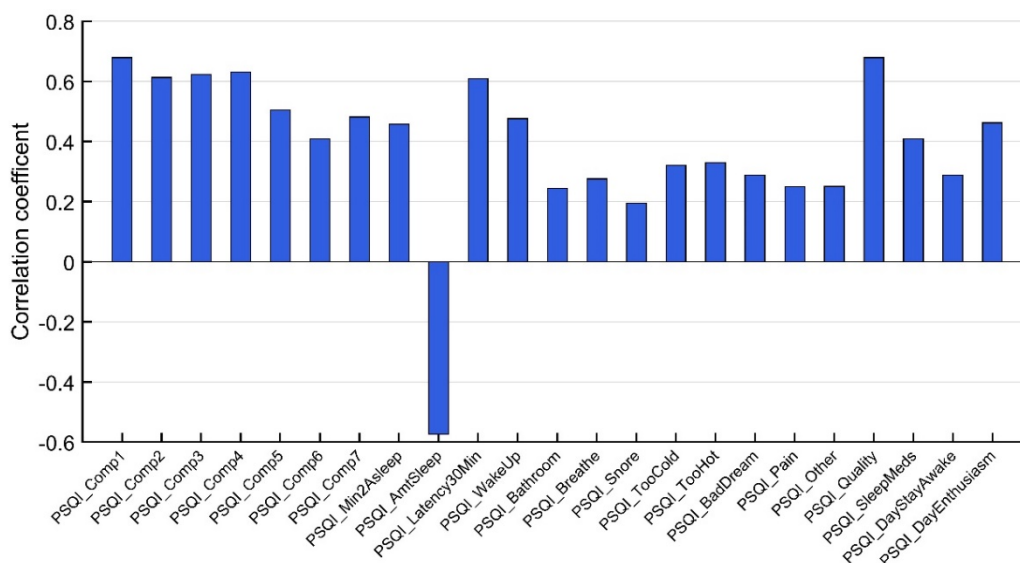

PSQI\_BedTime: During the past month, when have you usually gone to bed at night?  
 PSQI\_Min2Asleep: During the past month, how long has it usually taken you to fall asleep each night.  
 PSQI\_GetUpTime: During the past month, when have you usually gotten up in the morning?  
 PSQI\_Latency30Min: During the past month, how often have you had trouble sleeping because you... (a) Cannot get to sleep within 30 minutes; 0=Not during the past month, 1=Less than once a week, 2=Once or twice a week, 3=3 or more times a week.  
 PSQI\_WakeUp: During the past month, how often have you had trouble sleeping because you... (b) Wake up in the middle of the night or early morning; 0=Not during the past month, 1=Less than once a week, 2=Once or twice a week, 3=3 or more times a week.  
 PSQI\_Bathroom: During the past month, how often have you had trouble sleeping because you... (c) Have to get up to use the bathroom; 0=Not during the past month, 1=Less than once a week, 2=Once or twice a week, 3=3 or more times a week.  
 PSQI\_Breathe: During the past month, how often have you had trouble sleeping because you... (d) Cannot breathe comfortably; 0=Not during the past month, 1=Less than once a week, 2=Once or twice a week, 3=3 or more times a week.  
 PSQI\_Snore: During the past month, how often have you had trouble sleeping because you... (e) Cough or snore loudly; 0=Not during the past month, 1=Less than once a week, 2=Once or twice a week, 3=3 or more times a week.  
 PSQI\_TooCold: During the past month, how often have you had trouble sleeping because you... (f) Feel too cold; 0=Not during the past month, 1=Less than once a week, 2=Once or twice a week, 3=3 or more times a week.  
 PSQI\_TooHot: During the past month, how often have you had trouble sleeping because you... (g) Feel too hot; 0=Not during the past month, 1=Less than once a week, 2=Once or twice a week, 3=3 or more times a week.  
 PSQI\_BadDream: During the past month, how often have you had trouble sleeping because you... (h) Had bad dreams; 0=Not during the past month, 1=Less than once a week, 2=Once or twice a week, 3=3 or more times a week.  
 PSQI\_Pain: During the past month, how often have you had trouble sleeping because you... (i) Have pain; 0=Not during the past month, 1=Less than once a week, 2=Once or twice a week, 3=3 or more times a week.  
 PSQI\_Other: During the past month, how often have you had trouble sleeping because of... (j) Other reason(s), as described in 5j. pt2 0=Not during the past month, 1=Less than once a week, 2=Once or twice a week, 3=3 or more times a week.  
 PSQI\_Quality: During the past month, how would you rate your sleep quality overall?  
 PSQI\_SleepMeds: During the past month, how often have you taken medicine (prescribed or \"over the counter\") to help you sleep?  
 PSQI\_DayStayAwake: During the past month, how often have you had trouble staying awake while driving, eating meals, or engaging in social activity?  
 PSQI\_DayEnthusiasm: During the past month, how much of a problem has it been for you to keep up enough enthusiasm to get things done?  
 PSQI\_Comp1-7: the PSQI components.

**eFigure 2.** Brain areas with functional connectivities related to both the sleep quality (PSQI) and the ASR DSM Depressive Problems scores from the HCP analysis. The color reflects the number of correlated links in each of the 250 areas in the atlas by Shen et al<sup>10</sup>. All of the links are positively correlated with the Depressive Problems score, and details are shown in Table S4. There were 39 such links (shown in Table S4, significant with NBS correction,  $p < 0.05$ ).

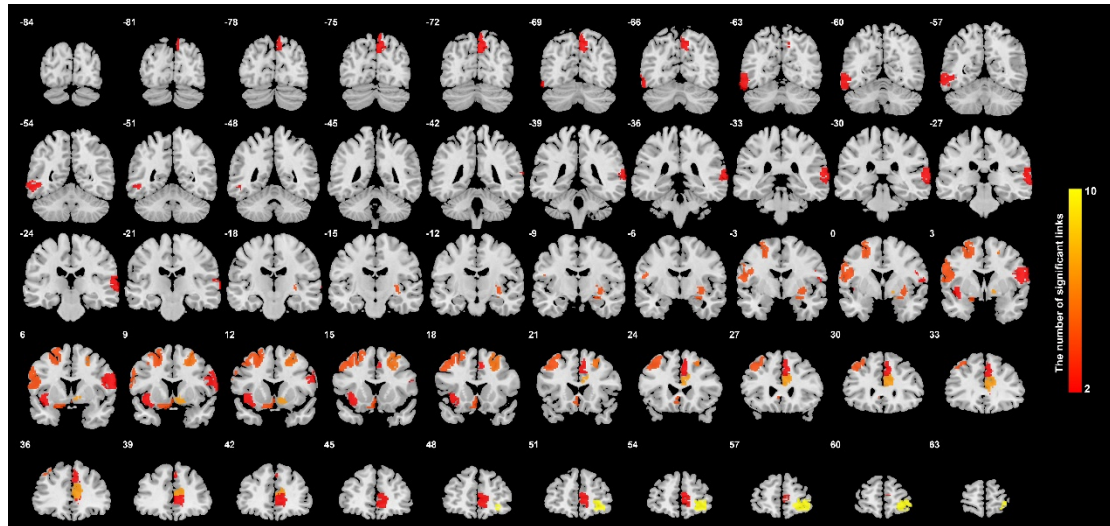

**eFigure 3.** Brain areas with functional connectivities related to the ASR DSM Depressive Problems scores from the HCP analysis. The significance value for the links to be included is  $p < 0.005$  uncorrected. The color reflects the number of correlated links in each of the 250 areas in the atlas by Shen et al.<sup>10</sup>. Most of the links are positively correlated with the depressive problems score, and details are shown in Table S2.

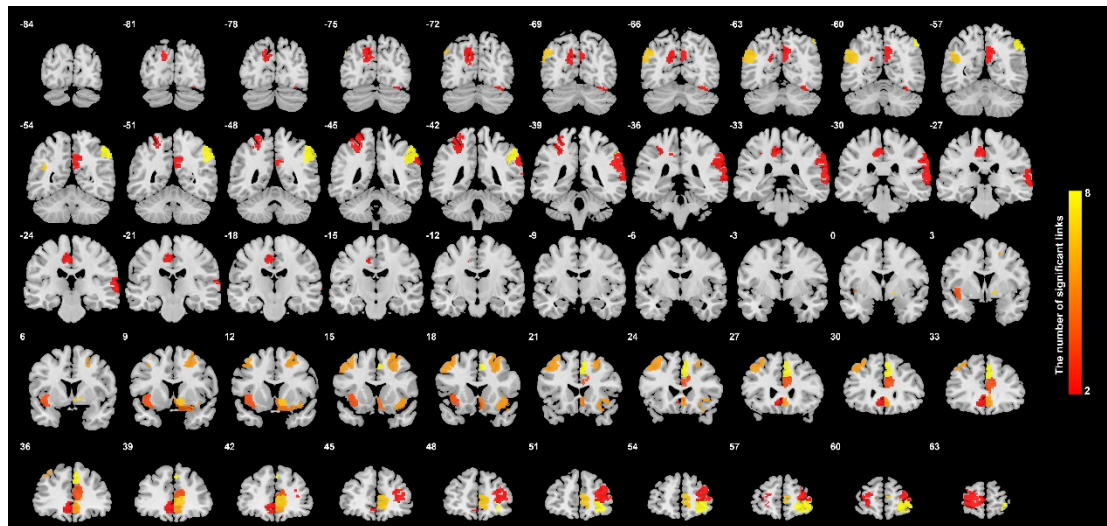

**eFigure 4.** The Shen atlas areas with functional connectivities related to sleep quality. There were 162 such links significant with NBS correction,  $p < 0.05$ . All of the links are positively correlated with the sleep quality index (PSQI). The data here correspond to those in Fig. 1A. The amygdala is not included as a separate area in the Shen atlas, but does have FC related to sleep quality as shown here.

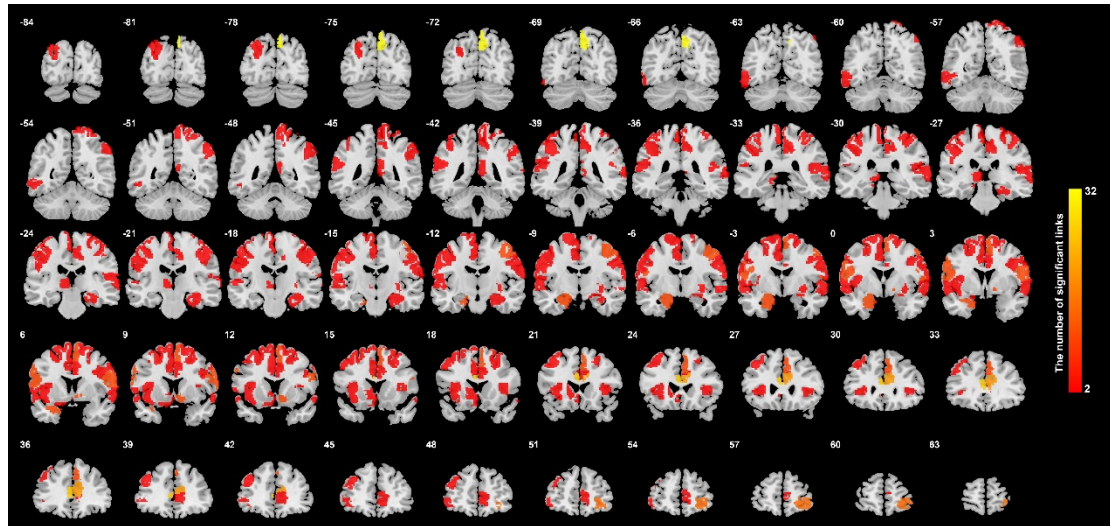



**eFigure 5.** Mediation analysis: the mediation implemented by functional connectivity from poor sleep quality (PSQI score) on the depressive problems score is significant (3.4% of the total effect size,  $\beta=0.016$ ,  $p=0.0095$ ). This provides evidence that the 39 functional connectivity links described in the paper may underlie the relation between sleep and depressive problems. Path A: the effect of sleep quality on the mediator (functional connectivity); Path B: the effect of the mediator (functional connectivity) on the outcome (depressive problems); Path C: the total effect of the sleep quality on the outcome (depressive problems); Path C': the direct effect of the sleep quality on the outcome (depressive problems) controlling for the mediator (functional connectivity). The beta values show the regression coefficient<sup>19</sup> of the effect of the independent variable (the sleep quality score) on the dependent variable (the depressive problems score). It should be noted that the absolute values of beta cannot be compared with those in Fig. 2D since they are from a different regression model.

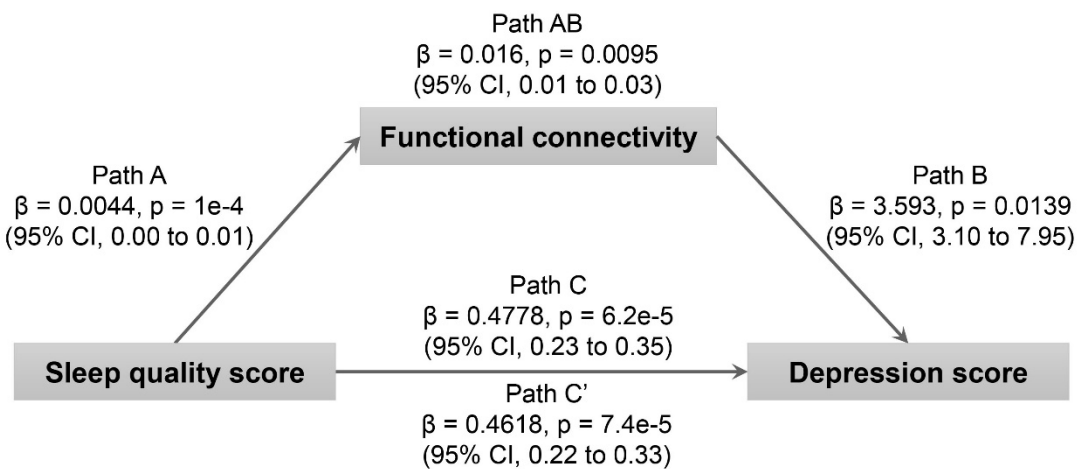

**eTable 1.** The anatomical regions defined in each hemisphere using the Shen atlas <sup>10</sup>, with appropriate names provided for each Shen atlas region by finding the corresponding part in the AAL2 atlas <sup>17</sup>.

| No . | Region name         | Anatomical description                                                     | No . | Region name          | Anatomical description                   |
|------|---------------------|----------------------------------------------------------------------------|------|----------------------|------------------------------------------|
| 1    | OFCpost_R           | Posterior orbitofrontal gyrus                                              | 126  | Frontal_Mid_2_R      | Middle frontal gyrus                     |
| 2    | OFCpost_L           | Posterior orbitofrontal gyrus                                              | 127  | Frontal_Sup_Media1_R | Superior frontal gyrus, medial           |
| 3    | OFCant_R            | Anterior orbitofrontal gyrus                                               | 128  | Cuneus_R             | Cuneus                                   |
| 4    | OFCant_L            | Anterior orbitofrontal gyrus                                               | 129  | ParaHippocampal_R    | Parahippocampal gyrus                    |
| 5    | OFCmed_R            | Medial orbitofrontal gyrus                                                 | 130  | Cingulate_Post_R     | Posterior cingulate gyrus                |
| 6    | OFCmed_L            | Medial orbitofrontal gyrus                                                 | 131  | Lingual_R            | Lingual gyrus                            |
| 7    | Rectus_R            | Gyrus rectus                                                               | 132  | Frontal_Mid_2_R      | Middle frontal gyrus                     |
| 8    | Rectus_L            | Gyrus rectus                                                               | 133  | Cingulate_Mid_R      | Middle cingulate & paracingulate gyri    |
| 9    | Olfactory_R         | Olfactory cortex                                                           | 134  | Precentral_R         | Precentral gyrus                         |
| 10   | Olfactory_L         | Olfactory cortex                                                           | 135  | Frontal_Mid_2_L      | Middle frontal gyrus                     |
| 11   | OFClat_R            | Lateral orbitofrontal gyrus                                                | 136  | Frontal_Inf_Tri_L    | Inferior frontal gyrus, triangular part  |
| 12   | OFClat_L            | Lateral orbitofrontal gyrus                                                | 137  | Frontal_Inf_Oper_L   | Inferior frontal gyrus, opercular part   |
| 13   | Frontal_Inf_Orb_2_R | Inferior Frontal Gyrus, orbital part                                       | 138  | Precuneus_L          | Precuneus                                |
| 14   | Frontal_Inf_Orb_2_L | Inferior Frontal Gyrus, orbital part                                       | 139  | Temporal_Inf_L       | Inferior temporal gyrus                  |
| 15   | Precentral_R        | Precentral gyrus                                                           | 140  | Postcentral_L        | Postcentral gyrus                        |
| 16   | Frontal_Sup_2_R     | Superior frontal gyrus, dorsolateral                                       | 141  | Putamen_L            | Lenticular nucleus, Putamen              |
| 17   | Frontal_Med_Orb_R   | Superior frontal gyrus, medial orbital (or ventromedial prefrontal cortex) | 142  | Caudate_L            | Caudate nucleus                          |
| 18   | Postcentral_R       | Postcentral gyrus                                                          | 143  | Cingulate_Mid_L      | Middle cingulate & paracingulate gyri    |
| 19   | SupraMarginal_R     | Supramarginal gyrus                                                        | 144  | Occipital_Mid_L      | Middle occipital gyrus                   |
| 20   | OFClat2             | Lateral orbitofrontal cortex                                               | 145  | Postcentral_L        | Postcentral gyrus                        |
| 21   | Precentral_R        | Precentral gyrus                                                           | 146  | Thalamus_L           | Thalamus                                 |
| 22   | Postcentral_R       | Postcentral gyrus                                                          | 147  | Calcarine_L          | Calcarine fissure and surrounding cortex |
| 23   | Frontal_Mid_2_R     | Middle frontal gyrus                                                       | 148  | Postcentral_L        | Postcentral gyrus                        |
| 24   | Temporal_Inf_R      | Inferior temporal gyrus                                                    | 149  | Parietal_Inf_L       | Inferior parietal gyrus, excluding       |

|    |                      |                                          |         |                     |                                                                   |
|----|----------------------|------------------------------------------|---------|---------------------|-------------------------------------------------------------------|
|    |                      |                                          |         |                     | supramarginal and angular gyri                                    |
| 25 | Thalamus_R           | Thalamus                                 | 15<br>0 | Cingulate_Ant_L     | Anterior cingulate & paracingulate gyri                           |
| 26 | Lingual_R            | Lingual gyrus                            | 15<br>1 | Insula_L            | Insula                                                            |
| 27 | Calcarine_R          | Calcarine fissure and surrounding cortex | 15<br>2 | Frontal_Mid_2_L     | Middle frontal gyrus                                              |
| 28 | Heschl_R             | Heschl's gyrus                           | 15<br>3 | Calcarine_L         | Calcarine fissure and surrounding cortex                          |
| 29 | Precuneus_R          | Precuneus                                | 15<br>4 | Parietal_Inf_L      | Inferior parietal gyrus, excluding supramarginal and angular gyri |
| 30 | SupraMarginal_R      | Supramarginal gyrus                      | 15<br>5 | Thalamus_L          | Thalamus                                                          |
| 31 | Temporal_Sup_R       | Superior temporal gyrus                  | 15<br>6 | Lingual_L           | Lingual gyrus                                                     |
| 32 | Temporal_Inf_R       | Inferior temporal gyrus                  | 15<br>7 | Insula_L            | Insula                                                            |
| 33 | Frontal_Inf_Tri_R    | Inferior frontal gyrus, triangular part  | 15<br>8 | Precuneus_L         | Precuneus                                                         |
| 34 | Precuneus_R          | Precuneus                                | 15<br>9 | Supp_Motor_Area_L   | Supplementary motor area                                          |
| 35 | Temporal_Mid_R       | Middle temporal gyrus                    | 16<br>0 | Cingulate_Mid_L     | Middle cingulate & paracingulate gyri                             |
| 36 | Angular_R            | Angular gyrus                            | 16<br>1 | Cingulate_Mid_L     | Middle cingulate & paracingulate gyri                             |
| 37 | Caudate_R            | Caudate nucleus                          | 16<br>2 | Precentral_L        | Precentral gyrus                                                  |
| 38 | Temporal_Pole_Mid_R  | Temporal pole: middle temporal gyrus     | 16<br>3 | Fusiform_L          | Fusiform gyrus                                                    |
| 39 | Cingulate_Mid_R      | Middle cingulate & paracingulate gyri    | 16<br>4 | Frontal_Mid_2_L     | Middle frontal gyrus                                              |
| 40 | Postcentral_R        | Postcentral gyrus                        | 16<br>5 | Cingulate_Ant_L     | Anterior cingulate & paracingulate gyri                           |
| 41 | Parietal_Sup_R       | Superior parietal gyrus                  | 16<br>6 | Temporal_Pole_Mid_L | Temporal pole: middle temporal gyrus                              |
| 42 | Postcentral_R        | Postcentral gyrus                        | 16<br>7 | Cingulate_Ant_L     | Anterior cingulate & paracingulate gyri                           |
| 43 | Temporal_Mid_R       | Middle temporal gyrus                    | 16<br>8 | Temporal_Sup_L      | Superior temporal gyrus                                           |
| 44 | Postcentral_R        | Postcentral gyrus                        | 16<br>9 | Calcarine_L         | Calcarine fissure and surrounding cortex                          |
| 45 | Temporal_Inf_R       | Inferior temporal gyrus                  | 17<br>0 | Occipital_Mid_L     | Middle occipital gyrus                                            |
| 46 | Cuneus_R             | Cuneus                                   | 17<br>1 | Precuneus_L         | Precuneus                                                         |
| 47 | Frontal_Sup_Medial_R | Superior frontal gyrus, medial           | 17<br>2 | Supp_Motor_Area_L   | Supplementary motor area                                          |
| 48 | Occipital_Mid_R      | Middle occipital gyrus                   | 17<br>3 | Temporal_Pole_Sup_L | Temporal pole: superior temporal gyrus                            |

|    |                          |                                                                            |         |                               |                                                                   |
|----|--------------------------|----------------------------------------------------------------------------|---------|-------------------------------|-------------------------------------------------------------------|
| 49 | Occipital_Sup_R          | Superior occipital gyrus                                                   | 17<br>4 | Cuneus_L                      | Cuneus                                                            |
| 50 | Precuneus_R              | Precuneus                                                                  | 17<br>5 | Hippocampus_L                 | Hippocampus                                                       |
| 51 | ParaHippocampal_R        | Parahippocampal gyrus                                                      | 17<br>6 | Angular_L                     | Angular gyrus                                                     |
| 52 | Insula_R                 | Insula                                                                     | 17<br>7 | Frontal_Mid_Orb_R (or OFClat) | Lateral orbital gyrus                                             |
| 53 | Temporal_Sup_R           | Superior temporal gyrus                                                    | 17<br>8 | Angular_L                     | Angular gyrus                                                     |
| 54 | Precuneus_R              | Precuneus                                                                  | 17<br>9 | SupraMarginal_L               | Supramarginal gyrus                                               |
| 55 | Frontal_Sup_Media<br>l_R | Superior frontal gyrus, medial                                             | 18<br>0 | Precentral_L                  | Precentral gyrus                                                  |
| 56 | Cingulate_Post_R         | Posterior cingulate cortex (retrosplenial)                                 | 18<br>1 | Temporal_Inf_L                | Inferior temporal gyrus                                           |
| 57 | Calcarine_R              | Calcarine fissure and surrounding cortex                                   | 18<br>2 | Hippocampus_L                 | Hippocampus                                                       |
| 58 | Postcentral_R            | Postcentral gyrus                                                          | 18<br>3 | Frontal_Sup_2_L               | Superior frontal gyrus, dorsolateral                              |
| 59 | Temporal_Mid_R           | Middle temporal gyrus                                                      | 18<br>4 | Temporal_Inf_L                | Inferior temporal gyrus                                           |
| 60 | Caudate_R                | Caudate nucleus                                                            | 18<br>5 | Frontal_Sup_2_L               | Superior frontal gyrus, dorsolateral                              |
| 61 | Calcarine_R              | Calcarine fissure and surrounding cortex                                   | 18<br>6 | Cingulate_Post_L              | Posterior cingulate gyrus                                         |
| 62 | Cingulate_Ant_R          | Anterior cingulate & paracingulate gyri                                    | 18<br>7 | Lingual_L                     | Lingual gyrus                                                     |
| 63 | Cingulate_Mid_R          | Middle cingulate & paracingulate gyri                                      | 18<br>8 | Precentral_L                  | Precentral gyrus                                                  |
| 64 | Temporal_Sup_R           | Superior temporal gyrus                                                    | 18<br>9 | Insula_L                      | Insula                                                            |
| 65 | Postcentral_R            | Postcentral gyrus                                                          | 19<br>0 | Lingual_L                     | Lingual gyrus                                                     |
| 66 | Hippocampus_R            | Hippocampus                                                                | 19<br>1 | Temporal_Mid_L                | Middle temporal gyrus                                             |
| 67 | Supp_Motor_Area_R        | Supplementary motor area                                                   | 19<br>2 | Temporal_Mid_L                | Middle temporal gyrus                                             |
| 68 | Parietal_Sup_R           | Superior parietal gyrus                                                    | 19<br>3 | Fusiform_L                    | Fusiform gyrus                                                    |
| 69 | Temporal_Mid_R           | Middle temporal gyrus                                                      | 19<br>4 | Occipital_Mid_L               | Middle occipital gyrus                                            |
| 70 | Frontal_Mid_2_R          | Middle frontal gyrus                                                       | 19<br>5 | Frontal_Inf_Tri_L             | Inferior frontal gyrus, triangular part                           |
| 71 | Frontal_Sup_2_R          | Superior frontal gyrus, dorsolateral                                       | 19<br>6 | Insula_L                      | Insula                                                            |
| 72 | Frontal_Med_Orb_R        | Superior frontal gyrus, medial orbital (or ventromedial prefrontal cortex) | 19<br>7 | Fusiform_L                    | Fusiform gyrus                                                    |
| 73 | Frontal_Mid_2_R          | Middle frontal gyrus                                                       | 19<br>8 | Temporal_Sup_L                | Superior temporal gyrus                                           |
| 74 | Cingulate_Ant_R          | Anterior cingulate & paracingulate gyri                                    | 19<br>9 | Parietal_Inf_L                | Inferior parietal gyrus, excluding supramarginal and angular gyri |
| 75 | Temporal_Pole_Mid_R      | Temporal pole: middle temporal gyrus                                       | 20<br>0 | Occipital_Mid_L               | Middle occipital gyrus                                            |

|     |                     |                                                                   |         |                          |                                        |
|-----|---------------------|-------------------------------------------------------------------|---------|--------------------------|----------------------------------------|
| 76  | Cingulate_Mid_R     | Middle cingulate & paracingulate gyri                             | 20<br>1 | Cuneus_L                 | Cuneus                                 |
| 77  | Frontal_Mid_2_R     | Middle frontal gyrus                                              | 20<br>2 | Precuneus_L              | Precuneus                              |
| 78  | Fusiform_R          | Fusiform gyrus                                                    | 20<br>3 | Frontal_Sup_Media<br>1_L | Superior frontal gyrus, medial         |
| 79  | Temporal_Sup_R      | Superior temporal gyrus                                           | 20<br>4 | Frontal_Mid_2_L          | Middle frontal gyrus                   |
| 80  | Hippocampus_R       | Hippocampus                                                       | 20<br>5 | Lingual_L                | Lingual gyrus                          |
| 81  | Temporal_Pole_Sup_R | Temporal pole: superior temporal gyrus                            | 20<br>6 | Frontal_Sup_2_L          | Superior frontal gyrus, dorsolateral   |
| 82  | Parietal_Sup_R      | Superior parietal gyrus                                           | 20<br>7 | Temporal_Mid_L           | Middle temporal gyrus                  |
| 83  | Cingulate_Ant_R     | Anterior cingulate & paracingulate gyri                           | 20<br>8 | Cingulate_Mid_L          | Middle cingulate & paracingulate gyri  |
| 84  | Insula_R            | Insula                                                            | 20<br>9 | Parietal_Sup_L           | Superior parietal gyrus                |
| 85  | Temporal_Sup_R      | Superior temporal gyrus                                           | 21<br>0 | Hippocampus_L            | Hippocampus                            |
| 86  | Cuneus_R            | Cuneus                                                            | 21<br>1 | Temporal_Mid_L           | Middle temporal gyrus                  |
| 87  | Frontal_Sup_2_R     | Superior frontal gyrus, dorsolateral                              | 21<br>2 | Fusiform_L               | Fusiform gyrus                         |
| 88  | Fusiform_R          | Fusiform gyrus                                                    | 21<br>3 | Lingual_L                | Lingual gyrus                          |
| 89  | Frontal_Mid_2_R     | Middle frontal gyrus                                              | 21<br>4 | Temporal_Sup_L           | Superior temporal gyrus                |
| 90  | Temporal_Mid_R      | Middle temporal gyrus                                             | 21<br>5 | Temporal_Inf_L           | Inferior temporal gyrus                |
| 91  | Temporal_Inf_R      | Inferior temporal gyrus                                           | 21<br>6 | Parietal_Sup_L           | Superior parietal gyrus                |
| 92  | Insula_R            | Insula                                                            | 21<br>7 | SupraMarginal_L          | Supramarginal gyrus                    |
| 93  | Cingulate_Mid_R     | Middle cingulate & paracingulate gyri                             | 21<br>8 | Precentral_L             | Precentral gyrus                       |
| 94  | Insula_R            | Insula                                                            | 21<br>9 | Temporal_Inf_L           | Inferior temporal gyrus                |
| 95  | Parietal_Inf_R      | Inferior parietal gyrus, excluding supramarginal and angular gyri | 22<br>0 | Temporal_Pole_Sup_L      | Temporal pole: superior temporal gyrus |
| 96  | Temporal_Mid_R      | Middle temporal gyrus                                             | 22<br>1 | SupraMarginal_L          | Supramarginal gyrus                    |
| 97  | Lingual_R           | Lingual gyrus                                                     | 22<br>2 | Insula_L                 | Insula                                 |
| 98  | Fusiform_R          | Fusiform gyrus                                                    | 22<br>3 | Occipital_Inf_L          | Inferior occipital gyrus               |
| 99  | Putamen_R           | Lenticular nucleus, Putamen                                       | 22<br>4 | Frontal_Sup_Media<br>1_L | Superior frontal gyrus, medial         |
| 100 | Insula_R            | Insula                                                            | 22<br>5 | Precuneus_L              | Precuneus                              |
| 101 | Parietal_Inf_R      | Inferior parietal gyrus, excluding supramarginal and angular gyri | 22<br>6 | Occipital_Mid_L          | Middle occipital gyrus                 |
| 102 | Frontal_Sup_2_R     | Superior frontal gyrus, dorsolateral                              | 22<br>7 | Frontal_Mid_2_L          | Middle frontal gyrus                   |

|     |                     |                                                                            |     |                      |                                                                            |
|-----|---------------------|----------------------------------------------------------------------------|-----|----------------------|----------------------------------------------------------------------------|
| 103 | Occipital_Inf_R     | Inferior occipital gyrus                                                   | 228 | Paracentral_Lobule_L | Paracentral lobule                                                         |
| 104 | Frontal_Inf_Tri_R   | Inferior frontal gyrus, triangular part                                    | 229 | Postcentral_L        | Postcentral gyrus                                                          |
| 105 | Supp_Motor_Area_R   | Supplementary motor area                                                   | 230 | Precuneus_L          | Precuneus                                                                  |
| 106 | Occipital_Sup_R     | Superior occipital gyrus                                                   | 231 | Occipital_Inf_L      | Inferior occipital gyrus                                                   |
| 107 | Frontal_Inf_Tri_R   | Inferior frontal gyrus, triangular part                                    | 232 | Cingulate_Mid_L      | Middle cingulate & paracingulate gyri                                      |
| 108 | Fusiform_R          | Fusiform gyrus                                                             | 233 | Frontal_Mid_2_L      | Middle frontal gyrus                                                       |
| 109 | Fusiform_R          | Fusiform gyrus                                                             | 234 | Thalamus_L           | Thalamus                                                                   |
| 110 | Frontal_Inf_Oper_R  | Inferior frontal gyrus, opercular part                                     | 235 | Postcentral_L        | Postcentral gyrus                                                          |
| 111 | Fusiform_R          | Fusiform gyrus                                                             | 236 | Caudate_L            | Caudate nucleus                                                            |
| 112 | Fusiform_R          | Fusiform gyrus                                                             | 237 | Cingulate_Mid_L      | Middle cingulate & paracingulate gyri                                      |
| 113 | Caudate_R           | Caudate nucleus                                                            | 238 | Temporal_Pole_Mid_L  | Temporal pole: middle temporal gyrus                                       |
| 114 | Precentral_R        | Precentral gyrus                                                           | 239 | Hippocampus_L        | Hippocampus                                                                |
| 115 | Lingual_R           | Lingual gyrus                                                              | 240 | Frontal_Sup_Medial_L | Superior frontal gyrus, medial                                             |
| 116 | Thalamus_R          | Thalamus                                                                   | 241 | Temporal_Sup_L       | Superior temporal gyrus                                                    |
| 117 | Frontal_Med_Orb_R   | Superior frontal gyrus, medial orbital (or ventromedial prefrontal cortex) | 242 | Insula_L             | Insula                                                                     |
| 118 | Occipital_Mid_R     | Middle occipital gyrus                                                     | 243 | Calcarine_L          | Calcarine fissure and surrounding cortex                                   |
| 119 | Occipital_Mid_R     | Middle occipital gyrus                                                     | 244 | Cingulate_Ant_L      | Anterior cingulate & paracingulate gyri                                    |
| 120 | Temporal_Mid_R      | Middle temporal gyrus                                                      | 245 | Caudate_L            | Caudate nucleus                                                            |
| 121 | Temporal_Pole_Mid_R | Temporal pole: middle temporal gyrus                                       | 246 | Frontal_Med_Orb_L    | Superior frontal gyrus, medial orbital (or ventromedial prefrontal cortex) |
| 122 | Frontal_Inf_Oper_R  | Inferior frontal gyrus, opercular part                                     | 247 | Occipital_Mid_L      | Middle occipital gyrus                                                     |
| 123 | Parietal_Inf_R      | Inferior parietal gyrus, excluding supramarginal and angular gyri          | 248 | Frontal_Inf_Tri_L    | Inferior frontal gyrus, triangular part                                    |
| 124 | Calcarine_R         | Calcarine fissure and surrounding cortex                                   | 249 | Supp_Motor_Area_L    | Supplementary motor area                                                   |
| 125 | Putamen_R           | Lenticular nucleus, Putamen                                                | 250 | Postcentral_L        | Postcentral gyrus                                                          |

Note: \_L indicates left hemisphere; \_R indicates right hemisphere;

The AAL2 names provided were obtained by mapping the MNI coordinates of each Shen atlas area to the corresponding AAL2 atlas area<sup>17</sup>.

**eTable 2.** Functional connectivities related to the ASR DSM Depressive Problems scores from the HCP analysis using 1017 participants. The significance value for the links to be included is  $p < 0.005$  uncorrected. Each link is between two areas defined in the atlas by Shen et al<sup>10</sup>. A link positively correlated with the Depressive Problems score indicates that the functional connectivity of that link is positively correlated with the Depressive Problems score. The brain area names used are those for the corresponding AAL2 area as shown in Table S1. A Shen area in BA 12 has been included in OFClat. The functional connectivities of the lateral orbitofrontal cortex areas (OFClat, OFClat2, and Frontal\_Inf\_Orb2) were especially related to depression, in that removing the 92 participants who had ever been diagnosed with depression (leaving the column headed ‘Participants who had never been diagnosed with depression’) decreased the absolute value of the correlations by 0.036, whereas this removal decreased the correlation for the other functional connectivity links by only 0.023 ( $p = 0.053$ )

| Functional connectivity |                   | All participants |         | Participants who had never been diagnosed with depression |         | Functional connectivity |                     | All participants |         | Participants who had never been diagnosed with depression |         |
|-------------------------|-------------------|------------------|---------|-----------------------------------------------------------|---------|-------------------------|---------------------|------------------|---------|-----------------------------------------------------------|---------|
|                         |                   | r value          | p value | r value                                                   | p value |                         |                     | r value          | p value | r value                                                   | p value |
| Cingulate_Ant_R         | Frontal_Mid_2_L   | 0.125            | 0.0001  | 0.084                                                     | 0.013   | Frontal_Mid_2_R         | Cingulate_Ant_R     | 0.107            | 0.0027  | 0.115                                                     | 0.001   |
| Insula_R                | Cingulate_Ant_R   | 0.122            | 0.0002  | 0.087                                                     | 0.0097  | Frontal_Mid_2_R         | Frontal_Med_Orb_R   | 0.101            | 0.0027  | 0.068                                                     | 0.0474  |
| OFClat2                 | Insula_L          | 0.120            | 0.0003  | 0.080                                                     | 0.0165  | Frontal_Mid_2_R         | Insula_L            | 0.101            | 0.0027  | 0.083                                                     | 0.0115  |
| Cingulate_Ant_R         | Frontal_Mid_2_L   | 0.124            | 0.0003  | 0.085                                                     | 0.0121  | Cingulate_Mid_R         | Frontal_Mid_2_L     | 0.093            | 0.0027  | 0.062                                                     | 0.0719  |
| Cuneus_L                | Frontal_Sup_2_L   | -0.115           | 0.0004  | -0.109                                                    | 0.0016  | OFClat2                 | Cingulate_Ant_R     | 0.106            | 0.0029  | 0.061                                                     | 0.0767  |
| Rectus_R                | Cuneus_L          | -0.113           | 0.0005  | -0.095                                                    | 0.0046  | Parietal_Inf_R          | Temporal_Pole_Sup_L | 0.099            | 0.0029  | 0.059                                                     | 0.0867  |
| Frontal_Mid_2_R         | Angular_L         | 0.104            | 0.0006  | 0.062                                                     | 0.0702  | Caudate_R               | Frontal_Inf_Tri_L   | 0.097            | 0.0033  | 0.077                                                     | 0.0226  |
| Cingulate_Mid_R         | Angular_L         | 0.111            | 0.0006  | 0.065                                                     | 0.0535  | Cingulate_Ant_R         | Angular_L           | 0.097            | 0.0033  | 0.042                                                     | 0.1991  |
| Frontal_Mid_2_R         | Frontal_Med_Orb_R | 0.112            | 0.0009  | 0.101                                                     | 0.0021  | Caudate_R               | Frontal_Mid_2_L     | 0.095            | 0.0034  | 0.096                                                     | 0.0035  |
| SupraMarginal_R         | Temporal_Sup_R    | 0.107            | 0.001   | 0.081                                                     | 0.015   | Precuneus_R             | Cingulate_Mid_R     | 0.095            | 0.0035  | 0.081                                                     | 0.017   |

|                     |                      |        |        |        |        |                 |                      |        |        |        |        |
|---------------------|----------------------|--------|--------|--------|--------|-----------------|----------------------|--------|--------|--------|--------|
|                     |                      |        |        |        | 4      |                 |                      |        |        |        | 6      |
| Frontal_Mid_2_R     | Angular_L            | 0.108  | 0.001  | 0.104  | 0.0021 | Cingulate_Ant_R | Precentral_L         | 0.099  | 0.0035 | 0.047  | 0.1723 |
| Frontal_Inf_Orb_2_R | Cingulate_Ant_R      | 0.111  | 0.0011 | 0.069  | 0.0436 | Fusiform_R      | Cuneus_L             | -0.093 | 0.0035 | -0.062 | 0.0612 |
| Cingulate_Ant_R     | Cingulate_Mid_R      | 0.100  | 0.0012 | 0.074  | 0.0332 | Parietal_Inf_R  | Cingulate_Mid_L      | 0.102  | 0.0035 | 0.111  | 0.0018 |
| Frontal_Med_Orb_R   | Cingulate_Mid_R      | 0.107  | 0.0013 | 0.070  | 0.0403 | Frontal_Mid_2_R | Cingulate_Ant_L      | 0.096  | 0.0036 | 0.100  | 0.0028 |
| Temporal_Inf_R      | Postcentral_L        | -0.103 | 0.0013 | -0.099 | 0.0033 | OFClat2         | Insula_L             | 0.099  | 0.0037 | 0.062  | 0.0659 |
| Cingulate_Mid_R     | Cingulate_Ant_L      | 0.103  | 0.0015 | 0.084  | 0.0146 | Insula_R        | Frontal_Med_Orb_R    | 0.097  | 0.0038 | 0.072  | 0.0342 |
| Parietal_Inf_R      | Hippocampus_L        | 0.108  | 0.0016 | 0.079  | 0.0194 | Insula_R        | Angular_L            | 0.099  | 0.0038 | 0.065  | 0.0531 |
| Parietal_Inf_R      | Fusiform_R           | 0.107  | 0.0018 | 0.074  | 0.0296 | OFClat2         | SupraMarginal_R      | 0.093  | 0.0039 | 0.054  | 0.1066 |
| Olfactory_R         | Cingulate_Mid_R      | 0.098  | 0.002  | 0.037  | 0.2884 | Cingulate_Mid_R | Caudate_R            | 0.092  | 0.0039 | 0.084  | 0.0108 |
| OFClat_L            | Frontal_Sup_2_L      | 0.098  | 0.0021 | 0.095  | 0.0055 | Olfactory_R     | Caudate_L            | 0.091  | 0.004  | 0.040  | 0.243  |
| OFClat2             | Frontal_Mid_2_R      | 0.098  | 0.0022 | 0.071  | 0.0366 | Olfactory_R     | Frontal_Mid_2_R      | 0.098  | 0.0041 | 0.068  | 0.0407 |
| Angular_L           | Frontal_Sup_Medial_L | -0.096 | 0.0023 | -0.055 | 0.0984 | Parietal_Inf_R  | Temporal_Mid_R       | 0.094  | 0.0042 | 0.116  | 0.0005 |
| Precentral_R        | OFClat2              | 0.100  | 0.0024 | 0.050  | 0.1368 | Postcentral_L   | Temporal_Inf_L       | -0.092 | 0.0044 | -0.097 | 0.0042 |
| OFClat2             | Insula_R             | 0.096  | 0.0024 | 0.067  | 0.0451 | OFCpost_L       | Frontal_Sup_Medial_R | 0.091  | 0.0045 | 0.072  | 0.0376 |
| Olfactory_R         | Parietal_Inf_R       | 0.103  | 0.0024 | 0.036  | 0.2849 | Insula_R        | Frontal_Mid_2_L      | 0.091  | 0.0045 | 0.081  | 0.0144 |
| Caudate_R           | Insula_L             | 0.099  | 0.0024 | 0.087  | 0.01   | Precentral_L    | Cingulate_Mid_L      | 0.092  | 0.0045 | 0.057  | 0.0999 |
| Cingulate_Mid_R     | Precuneus_L          | 0.097  | 0.0024 | 0.082  | 0.0155 | Temporal_Sup_R  | Parietal_Inf_R       | 0.091  | 0.0046 | 0.075  | 0.0258 |



---

|             |                 |        |        |            |            |                       |                 |       |        |       |            |
|-------------|-----------------|--------|--------|------------|------------|-----------------------|-----------------|-------|--------|-------|------------|
| Precuneus_R | Insula_R        | 0.101  | 0.0025 | 0.081      | 0.018<br>1 | Caudate_R             | Insula_L        | 0.091 | 0.0046 | 0.077 | 0.027<br>3 |
| Cuneus_R    | Fusiform_R      | -0.097 | 0.0025 | -0.06<br>5 | 0.050<br>8 | Frontal_Med_Orb_<br>R | Cingulate_Ant_L | 0.095 | 0.0049 | 0.059 | 0.081<br>6 |
| OFClat2     | SupraMarginal_L | 0.095  | 0.0025 | 0.048      | 0.146<br>9 | Parietal_Inf_R        | Lingual_L       | 0.095 | 0.0049 | 0.097 | 0.008<br>3 |
| Caudate_R   | Cingulate_Mid_L | 0.095  | 0.0025 | 0.095      | 0.005<br>2 |                       |                 |       |        |       |            |

**eTable 3.** Functional connectivities correlated with the ASR DSM Depressive Problems scores from the HCP analysis based on the 92 participants who had at some time been diagnosed with depression. The 58 links with a p-value < 0.001 uncorrected are shown. As shown in the Table the anterior cingulate cortex (Cingulate\_Ant) had 8 links significant at this level, and the lateral orbitofrontal cortex (OFClat\_2/Frontal\_Inf\_Orb) had 8 links. The other brain areas with more than 3 significant links included Angular (12 links), ParaHippocampal (7), Frontal\_Mid\_2 (12), Temporal (18), OFCant (3) and Cingulate\_Mid (9).

| Functional connectivity |                     | p value | r value | Functional connectivity |                      | p value | r value |
|-------------------------|---------------------|---------|---------|-------------------------|----------------------|---------|---------|
| Parietal_Inf_R          | ParaHippocampal_R   | 0.464   | <0.0001 | Temporal_Pole_Sup_R     | Frontal_Sup_Medial_L | 0.353   | 0.0006  |
| Cingulate_Ant_R         | Supp_Motor_Area_L   | 0.446   | <0.0001 | OFClat2                 | Cingulate_Mid_L      | 0.385   | 0.0006  |
| OFCant_R                | Temporal_Inf_L      | 0.476   | <0.0001 | Frontal_Mid_2_L         | Cingulate_Mid_L      | 0.347   | 0.0006  |
| Precuneus_R             | Temporal_Inf_L      | 0.383   | <0.0001 | Occipital_Mid_R         | Fusiform_L           | 0.351   | 0.0006  |
| OFClat2                 | Frontal_Mid_2_L     | 0.410   | <0.0001 | Angular_L               | Postcentral_L        | 0.383   | 0.0006  |
| ParaHippocampal_R       | Angular_L           | 0.370   | 0.0002  | Temporal_Inf_L          | Frontal_Mid_2_L      | 0.354   | 0.0006  |
| Parietal_Inf_R          | Temporal_Pole_Sup_L | 0.444   | 0.0002  | OFClat2                 | Cingulate_Mid_R      | 0.368   | 0.0007  |
| Angular_L               | Temporal_Pole_Sup_L | 0.422   | 0.0002  | Parietal_Inf_R          | Fusiform_R           | 0.375   | 0.0007  |
| Postcentral_R           | Cingulate_Ant_R     | 0.368   | 0.0003  | Olfactory_R             | Frontal_Mid_2_R      | 0.345   | 0.0007  |
| Frontal_Mid_2_R         | ParaHippocampal_R   | 0.399   | 0.0003  | Postcentral_R           | Angular_L            | 0.362   | 0.0007  |
| Temporal_Pole_Sup_R     | Precentral_L        | 0.364   | 0.0003  | Fusiform_R              | Angular_L            | 0.350   | 0.0007  |
| Angular_R               | Temporal_Sup_L      | 0.360   | 0.0003  | Cingulate_Ant_R         | Temporal_Inf_L       | 0.365   | 0.0007  |
| OFCant_R                | Temporal_Inf_L      | 0.366   | 0.0003  | Cingulate_Mid_R         | Temporal_Inf_L       | 0.337   | 0.0007  |
| Frontal_Mid_2_R         | Frontal_Mid_2_L     | 0.388   | 0.0003  | OFClat2                 | Precuneus_L          | 0.430   | 0.0007  |
| OFClat2                 | Cingulate_Mid_R     | 0.402   | 0.0004  | Occipital_Mid_R         | Calcarine_L          | 0.367   | 0.0008  |
| Temporal_Pole_Sup_R     | Cingulate_Ant_R     | 0.338   | 0.0004  | Cingulate_Ant_R         | Frontal_Mid_2_L      | 0.321   | 0.0008  |
| Angular_R               | Frontal_Mid_2_L     | 0.420   | 0.0004  | Temporal_Mid_R          | Cingulate_Mid_L      | 0.336   | 0.0008  |
| Precuneus_R             | Temporal_Inf_L      | 0.381   | 0.0004  | Cingulate_Ant_R         | Occipital_Mid_L      | 0.329   | 0.0008  |
| Occipital_Sup_R         | Occipital_Mid_L     | 0.347   | 0.0004  | Olfactory_R             | Frontal_Mid_2_R      | 0.369   | 0.0009  |
| ParaHippocampal_R       | Parietal_Inf_L      | 0.395   | 0.0004  | Temporal_Mid_R          | ParaHippocampal_R    | 0.359   | 0.0009  |
| Cuneus_R                | Parietal_Sup_L      | 0.394   | 0.0004  | Frontal_Mid_2_R         | ParaHippocampal_R    | 0.360   | 0.0009  |
| Temporal_Mid_R          | Postcentral_L       | 0.351   | 0.0004  | Cingulate_Ant_R         | Frontal_Inf_Oper_L   | 0.373   | 0.0009  |
| Frontal_Inf_Orb_2_L     | Cingulate_Ant_R     | 0.393   | 0.0005  | Postcentral_R           | Angular_L            | 0.382   | 0.0009  |
| Parietal_Inf_R          | Angular_L           | 0.386   | 0.0005  | Angular_R               | SupraMarginal_L      | 0.374   | 0.0009  |
| OFClat2                 | SupraMarginal_L     | 0.377   | 0.0005  | OFCant_R                | Temporal_Mid_L       | 0.363   | 0.0009  |
| Angular_R               | Cingulate_Mid_L     | 0.428   | 0.0005  | Frontal_Mid_2_R         | Temporal_Mid_L       | 0.363   | 0.0009  |
| Angular_R               | Frontal_Mid_2_L     | 0.378   | 0.0005  | Parietal_Sup_R          | Occipital_Mid_L      | 0.336   | 0.0009  |
| ParaHippocampal_R       | Cingulate_Mid_R     | 0.350   | 0.0006  | OFClat2                 | Insula_L             | 0.348   | 0.0009  |

**eTable 4.** The results of the mediation analysis performed for the 39 individual links that were correlated with sleep quality and the Depressive Problems score. The analysis is analogous to that shown in Fig. 2D, but here is for individual links, instead of for the mean value of the functional connectivity of these 39 links. The paths correspond to those shown in Fig. 2D. All 39 links were found to underlie the relation between sleep quality and the Depressive Problems score in this analysis. A positive beta for path A indicates a positive correlation between the functional connectivity and the Depressive Problems score.

| Functional connectivity |                                 | path A  |         | path B  |         | path C' |         | path C  |         | path AB |         |
|-------------------------|---------------------------------|---------|---------|---------|---------|---------|---------|---------|---------|---------|---------|
|                         |                                 | Beta    | p value |
| Cingulate_Ant_R         | Frontal_Mid_2_L                 | 0.00511 | 0.00018 | 1.31786 | 0.02379 | 0.28144 | 0.00013 | 0.28817 | 0.00012 | 0.00673 | 0.01452 |
| OFClat2                 | Insula_L                        | 0.00400 | 0.00017 | 1.71605 | 0.01497 | 0.28130 | 0.00013 | 0.28817 | 0.00011 | 0.00687 | 0.00912 |
| Cingulate_Ant_R         | Frontal_Mid_2_L                 | 0.00467 | 0.00019 | 1.24311 | 0.02753 | 0.28236 | 0.00012 | 0.28817 | 0.00010 | 0.00581 | 0.01925 |
| Precentral_R            | OFClat2                         | 0.00364 | 0.00228 | 1.55282 | 0.01186 | 0.28251 | 0.00012 | 0.28817 | 0.00010 | 0.00566 | 0.00666 |
| Caudate_R               | Frontal_Inf_Tri_L               | 0.00139 | 0.00212 | 4.32195 | 0.00333 | 0.28218 | 0.00009 | 0.28817 | 0.00009 | 0.00599 | 0.00281 |
| OFClat2                 | Cingulate_Mid_R                 | 0.00359 | 0.00176 | 1.45532 | 0.01246 | 0.28294 | 0.00013 | 0.28817 | 0.00010 | 0.00523 | 0.00666 |
| OFClat2                 | Insula_L                        | 0.00287 | 0.00672 | 1.77966 | 0.00890 | 0.28307 | 0.00012 | 0.28817 | 0.00011 | 0.00510 | 0.00745 |
| OFClat2                 | Frontal_Mid_2_L                 | 0.00443 | 0.00700 | 1.30637 | 0.00435 | 0.28239 | 0.00013 | 0.28817 | 0.00012 | 0.00578 | 0.00562 |
| OFClat2                 | Insula_L                        | 0.00270 | 0.00361 | 2.12378 | 0.00247 | 0.28244 | 0.00011 | 0.28817 | 0.00010 | 0.00573 | 0.00288 |
| OFClat2                 | Precentral_R                    | 0.00368 | 0.00998 | 1.53636 | 0.00295 | 0.28251 | 0.00010 | 0.28817 | 0.00009 | 0.00566 | 0.00603 |
| OFClat2                 | Cingulate_Mid_L                 | 0.00334 | 0.00388 | 1.60279 | 0.00730 | 0.28282 | 0.00012 | 0.28817 | 0.00010 | 0.00535 | 0.00457 |
| Caudate_R               | Precentral_L                    | 0.00104 | 0.01472 | 4.65151 | 0.00573 | 0.28334 | 0.00009 | 0.28817 | 0.00009 | 0.00483 | 0.01050 |
| Cingulate_Ant_R         | Frontal_Mid_2_L                 | 0.00275 | 0.00653 | 1.96448 | 0.00359 | 0.28276 | 0.00012 | 0.28817 | 0.00011 | 0.00541 | 0.00513 |
| Cingulate_Ant_L         | Frontal_Mid_2_L                 | 0.00247 | 0.00331 | 1.90866 | 0.00451 | 0.28346 | 0.00011 | 0.28817 | 0.00010 | 0.00471 | 0.00386 |
| Caudate_R               | Frontal_Sup_2_L                 | 0.00115 | 0.00562 | 5.43865 | 0.00118 | 0.28191 | 0.00009 | 0.28817 | 0.00009 | 0.00626 | 0.00376 |
| OFClat2                 | Precentral_L                    | 0.00266 | 0.01140 | 2.50328 | 0.00011 | 0.28152 | 0.00010 | 0.28817 | 0.00008 | 0.00665 | 0.00525 |
| Frontal_Mid_2_R         | Precuneus_L                     | 0.00393 | 0.00389 | 1.26098 | 0.00487 | 0.28322 | 0.00010 | 0.28817 | 0.00009 | 0.00495 | 0.00489 |
| Cingulate_Mid_R         | Frontal_Mid_Orb_R<br>(orOFClat) | 0.00326 | 0.01015 | 1.46925 | 0.00786 | 0.28338 | 0.00010 | 0.28817 | 0.00010 | 0.00479 | 0.00811 |
| Frontal_Mid_2_R         | Hippocampus_L                   | 0.00227 | 0.00511 | 2.09409 | 0.01261 | 0.28342 | 0.00010 | 0.28817 | 0.00008 | 0.00475 | 0.00999 |
| OFClat2                 | Temporal_Sup_L                  | 0.00274 | 0.01427 | 2.05161 | 0.00141 | 0.28255 | 0.00009 | 0.28817 | 0.00009 | 0.00562 | 0.00841 |
| Temporal_Sup_R          | Cingulate_Ant_R                 | 0.00265 | 0.01114 | 1.95903 | 0.00510 | 0.28297 | 0.00010 | 0.28817 | 0.00010 | 0.00520 | 0.00835 |
| Caudate_R               | Supp_Motor_Area_L               | 0.00103 | 0.02722 | 4.27949 | 0.00695 | 0.28376 | 0.00011 | 0.28817 | 0.00011 | 0.00441 | 0.01835 |
| Cingulate_Ant_R         | Occipital_Mid_L                 | 0.00240 | 0.01055 | 2.21159 | 0.00182 | 0.28286 | 0.00012 | 0.28817 | 0.00010 | 0.00531 | 0.00607 |
| Precuneus_R             | Insula_L                        | 0.00271 | 0.02087 | 1.91137 | 0.00239 | 0.28300 | 0.00012 | 0.28817 | 0.00010 | 0.00517 | 0.01223 |
| Precentral_R            | Caudate_R                       | 0.00097 | 0.01668 | 5.33203 | 0.00193 | 0.28301 | 0.00010 | 0.28817 | 0.00011 | 0.00516 | 0.01063 |
| Olfactory_L             | Frontal_Sup_2_L                 | 0.00145 | 0.02277 | 3.35740 | 0.00189 | 0.28330 | 0.00011 | 0.28817 | 0.00011 | 0.00487 | 0.01425 |

---

|                 |                      |         |         |         |         |         |         |         |         |         |         |
|-----------------|----------------------|---------|---------|---------|---------|---------|---------|---------|---------|---------|---------|
| Temporal_Sup_R  | Putamen_R            | 0.00213 | 0.03281 | 2.01796 | 0.00962 | 0.28387 | 0.00010 | 0.28817 | 0.00008 | 0.00430 | 0.02195 |
| Olfactory_L     | Hippocampus_R        | 0.00078 | 0.03200 | 5.43644 | 0.01144 | 0.28394 | 0.00012 | 0.28817 | 0.00012 | 0.00423 | 0.02378 |
| Temporal_Sup_R  | Cingulate_Mid_R      | 0.00314 | 0.02490 | 1.40705 | 0.01160 | 0.28374 | 0.00013 | 0.28817 | 0.00012 | 0.00442 | 0.01972 |
| Frontal_Mid_2_R | Frontal_Sup_Medial_L | 0.00325 | 0.01016 | 1.34193 | 0.00771 | 0.28380 | 0.00010 | 0.28817 | 0.00010 | 0.00437 | 0.00923 |
| Cingulate_Ant_R | Temporal_Inf_L       | 0.00275 | 0.03044 | 1.60004 | 0.00818 | 0.28376 | 0.00009 | 0.28817 | 0.00008 | 0.00441 | 0.02067 |
| Cingulate_Ant_R | Frontal_Sup_2_L      | 0.00249 | 0.01388 | 2.10435 | 0.00133 | 0.28294 | 0.00012 | 0.28817 | 0.00010 | 0.00523 | 0.00705 |
| Precuneus_R     | Insula_R             | 0.00315 | 0.01736 | 1.74555 | 0.00097 | 0.28267 | 0.00012 | 0.28817 | 0.00010 | 0.00550 | 0.00933 |
| Olfactory_L     | Frontal_Mid_2_R      | 0.00134 | 0.01566 | 3.89546 | 0.00157 | 0.28294 | 0.00010 | 0.28817 | 0.00010 | 0.00522 | 0.00959 |
| Postcentral_R   | Caudate_R            | 0.00102 | 0.06300 | 4.23258 | 0.00323 | 0.28383 | 0.00008 | 0.28817 | 0.00009 | 0.00434 | 0.03925 |
| Putamen_R       | Fusiform_R           | 0.00090 | 0.06561 | 4.52322 | 0.00760 | 0.28411 | 0.00011 | 0.28817 | 0.00009 | 0.00405 | 0.04275 |
| Thalamus_L      | Precentral_L         | 0.00158 | 0.06823 | 2.99203 | 0.00079 | 0.28345 | 0.00011 | 0.28817 | 0.00010 | 0.00472 | 0.03799 |
| Cingulate_Ant_R | Temporal_Inf_L       | 0.00203 | 0.03308 | 2.20041 | 0.00203 | 0.28369 | 0.00011 | 0.28817 | 0.00010 | 0.00448 | 0.02032 |
| Precentral_R    | Putamen_R            | 0.00162 | 0.04949 | 2.67065 | 0.00273 | 0.28384 | 0.00011 | 0.28817 | 0.00010 | 0.00432 | 0.02913 |

**eTable 5.** The demographic characteristics of participants of the Biobank dataset.

| Basic information on the participants       |                               |                                                   |                             |                            |                       |                                                        |  |
|---------------------------------------------|-------------------------------|---------------------------------------------------|-----------------------------|----------------------------|-----------------------|--------------------------------------------------------|--|
| Age (year)                                  | Gender (Male / Female)        | Diastolic blood pressure 1                        | Diastolic blood pressure 2  | Qualifications (education) | BMI                   | Ever taken cannabis (no / yes)                         |  |
| 62.30 ± 7.48      3,696                     | 4695 / 5155                   | 78.60 ± 10.27                                     | 78.52 ± 9.78                | 2.17 ± 1.47                | 26.65 ± 3.99          | 4784 / 1755                                            |  |
| Smoking status (Never / Previous / Current) | Frequency of drinking alcohol | Amount of alcohol drunk on a typical drinking day | Mean framewise displacement | Volume of white matter     | Volume of grey matter | Sleeplessness / insomnia (never / sometimes / usually) |  |
| 1755 / 2917 / 360                           | 2.42 ± 1.06                   | 1.47 ± 0.99                                       | 0.182 ± 0.092               | 587987 ± 88192             | 650103 ± 88627        | 2259 / 4578 / 2937                                     |  |
| Sleep duration                              |                               |                                                   |                             |                            |                       |                                                        |  |
| 7.150 ± 1.036                               |                               |                                                   |                             |                            |                       |                                                        |  |

Values are n or mean ± SD.

Sleep duration measure: 'If the time you spend sleeping varies a lot, give the average time for a 24 hour day in the last 4 weeks.'

Sleeplessness / insomnia: "Do you have trouble falling asleep at night or do you wake up in the middle of the night?"

Note: some participants chose 'prefer not to answer', so the number of participants of each terms may differ.

---

## References

1. Glasser MF, Sotiropoulos SN, Wilson JA, et al. The minimal preprocessing pipelines for the Human Connectome Project. *Neuroimage*. 2013;80:105-124.
2. Navarro Schroder T, Haak KV, Zaragoza Jimenez NI, Beckmann CF, Doeller CF. Functional topography of the human entorhinal cortex. *Elife*. 2015;4.
3. Smith SM, Beckmann CF, Andersson J, et al. Resting-state fMRI in the Human Connectome Project. *Neuroimage*. 2013;80:144-168.
4. Salimi-Khorshidi G, Douaud G, Beckmann CF, Glasser MF, Griffanti L, Smith SM. Automatic denoising of functional MRI data: combining independent component analysis and hierarchical fusion of classifiers. *Neuroimage*. 2014;90:449-468.
5. Griffanti L, Salimi-Khorshidi G, Beckmann CF, et al. ICA-based artefact removal and accelerated fMRI acquisition for improved resting state network imaging. *Neuroimage*. 2014;95:232-247.
6. Colclough GL, Smith SM, Nichols TE, et al. The heritability of multi-modal connectivity in human brain activity. *Elife*. 2017;6.
7. Vidaurre D, Abeyesuriya R, Becker R, et al. Discovering dynamic brain networks from big data in rest and task. *Neuroimage*. 2017.
8. Smith SM, Nichols TE, Vidaurre D, et al. A positive-negative mode of population covariation links brain connectivity, demographics and behavior. *Nat Neurosci*. 2015;18(11):1565-1567.
9. Miller KL, Alfaro-Almagro F, Bangerter NK, et al. Multimodal population brain imaging in the UK Biobank prospective epidemiological study. *Nat Neurosci*. 2016;19(11):1523-1536.
10. Shen X, Tokoglu F, Papademetris X, Constable RT. Groupwise whole-brain parcellation from resting-state fMRI data for network node identification. *Neuroimage*. 2013;82:403-415.
11. Rosenberg MD, Finn ES, Scheinost D, et al. A neuromarker of sustained attention from whole-brain functional connectivity. *Nat Neurosci*. 2016;19(1):165-171.
12. Finn ES, Shen X, Scheinost D, et al. Functional connectome fingerprinting:

---

identifying individuals using patterns of brain connectivity. *Nat Neurosci*. 2015;18(11):1664-1671.

13. Zalesky A, Fornito A, Bullmore ET. Network-based statistic: identifying differences in brain networks. *Neuroimage*. 2010;53(4):1197-1207.

14. Zalesky A, Fornito A, Seal ML, et al. Disrupted axonal fiber connectivity in schizophrenia. *Biol Psychiatry*. 2011;69(1):80-89.

15. Zhang J, Wang J, Wu Q, et al. Disrupted brain connectivity networks in drug-naive, first-episode major depressive disorder. *Biol Psychiatry*. 2011;70(4):334-342.

16. Krienen FM, Yeo BT, Ge T, Buckner RL, Sherwood CC. Transcriptional profiles of supragranular-enriched genes associate with corticocortical network architecture in the human brain. *Proc Natl Acad Sci U S A*. 2016;113(4):E469-478.

17. Rolls ET, Joliot M, Tzourio-Mazoyer N. Implementation of a new parcellation of the orbitofrontal cortex in the automated anatomical labeling atlas. *Neuroimage*. 2015;122:1-5.

18. Dietch JR, Taylor DJ, Sethi K, Kelly K, Bramoweth AD, Roane BM. Psychometric Evaluation of the PSQI in U.S. College Students. *J Clin Sleep Med*. 2016;12(8):1121-1129.

19. Preacher KJ, Kelley K. Effect size measures for mediation models: quantitative strategies for communicating indirect effects. *Psychol Methods*. 2011;16(2):93-115.
